# Supplementary material for: Multi-heteroatom doped graphene-like carbon nanospheres with 3D inverse opal structure: a promising bisphenol-A remediation material
Source: Royal Society of Chemistry journal article supplement (doi:10.1039/c8en01196f), 2019-01-01
Supplement: c8en01196f1.pdf [file c8en01196f1.pdf]

**Supporting Information on**

**Multi-heteroatom doped graphene-like carbon  
nanospheres with 3D inverse opal structure: A  
promising bisphenol-A remediation material**

Weixue Wang, Xiangxue Wang, Jinlu Xing, Qiaobin Gong, Huihui Wang, Jianjun Wang, Zhe Chen,<sup>†</sup> Yuejie Ai<sup>†</sup>  
and Xiangke Wang<sup>†</sup>

MOE Key Lab of Resources and Environmental System optimization, College of Environmental  
Science and Engineering, North China Electric Power University, Beijing 102206, P. R. China

wwxue1989@126.com (Weixue Wang)

xxwang@ncepu.edu.cn (Xiangxue Wang)

g\_goldenroad@163.com (Jinlu Xing)

1272685333@qq.com (Qiaobin Gong)

wanghh128@163.com (Huihui Wang)

wangjj2016@ncepu.edu.cn (Jianjun Wang)

chenz@ncepu.edu.cn (Zhe Chen)

aiyuejie314@126.com (Yuejie Ai)

xkwang@ncepu.edu.cn (Xiangke Wang)

**There are 7 Pages with 6 Figures and 3 Tables in Supporting Information.**

**Batch adsorption experiments procedure.** The whole batch sorption experiments were performed in 10 mL glass vials. The suspensions of 2 mg NPS-IOC, the BPA stock solution, and the background electrolyte solution (0.01 mol/L NaNO<sub>3</sub>) were mixed in glass vials together to achieve the setting concentrations. The desired pH values were adjusted by adding negligible volume of 0.01 or 0.1 mol/L HNO<sub>3</sub> and/or NaOH, and the variances of pH were kept below 0.05 before and after adsorption. Then kept glass vials in thermostatic bath with constant agitation (150 rpm). After reaching adsorption equilibrium (24 h), aliquots of 2 ml were taken, following with the filtration by 0.45 μm polyethersulfone membrane before analysis. The concentrations of BPA were measured by using high performance liquid chromatography (HPLC) (Perkin Elmer Flexar) equipped with a Spheri-5 C18 column and UV detector. Water, ethanol with volume ratio of 30:70 was mixed as the mobile phases.

The adsorption percentage was described as (equation 1):

$$R = \frac{(C_0 - C_e)}{C_0} 100\% \quad (1)$$

Where  $C_0$  was the initial BPA concentration (mg/L) and  $C_e$  was the equilibrium BPA concentration (mg/L).

The distribution coefficient ( $K_d$ )<sup>1</sup>, which was usually applied to understand the adsorption ability of the adsorbent, was defined as (equation 2):

$$K_d = \frac{V(C_0 - C_e)}{m C_e} \quad (2)$$

Where  $m$  (g) was the mass of adsorbent NPS-IOC added into the glass vials,  $V$  (mL) was the volume of the solution,  $C_0$  and  $C_e$  represent the initial and equilibrium concentrations.

The sorption capacity  $Q_e$  (mg/g) was calculated from the following equations:

$$Q_e = \frac{(C_0 - C_e)V}{m} \quad (3)$$

Where  $V$  was the total volume of the suspension in the test tubes,  $m$  was the mass of the adsorbent in the test tube, and  $C_0$  (mg/L) and  $C_e$  (mg/L) were the initial and

equilibrium BPA concentrations after reaction, respectively.

The each experimental data was obtained by the average values of triple parallel samples and the data was the averages of detection with the relative errors of 5%.

The **pseudo-first-order kinetic model** is defined as (equation 4):

$$\ln (Q_e - Q_t) = \ln Q_e - k_1 t \quad (4)$$

The **pseudo-second-order kinetic model** is defined as (equation 5):

$$\frac{t}{Q_t} = \frac{1}{k_2 Q_e^2} + \frac{t}{Q_e} \quad (5)$$

Where  $k_1$  ( $\text{min}^{-1}$ ) and  $k_2$  ( $\text{g/mg}\cdot\text{min}$ ) were the pseudo-first-order and pseudo-second-order rate constant of BPA sorption, and  $t$  was adsorption time (min). The  $Q_e$  and  $Q_t$  were the amounts of BPA adsorbed (mg/g) at equilibrium and at contact time  $t$ , respectively.

**Langmuir model:**

$$Q_e = Q_m \frac{bC_e}{1 + bC_e} \quad (6)$$

Where  $C_e$  denotes the equilibrium concentration of BPA (mg/L),  $Q_e$  refers to the amount of BPA adsorbed per unit weight of the adsorbent at equilibrium (mg/g),  $Q_m$  (mg/g) is the maximum adsorption capacity.

**Freundlich model:**

$$Q_e = k_F C_e^n \quad (7)$$

Where  $n$  and  $k_F$  ( $\text{mg}^{1-n}\text{L}^n/\text{g}$ ) are Freundlich parameters,  $n$  is the level depending on removal equilibrium concentration;  $k_F$  is generally related to the adsorption ability of the adsorbent when the value of the adsorbate concentration is equal to 1.<sup>2,3</sup>

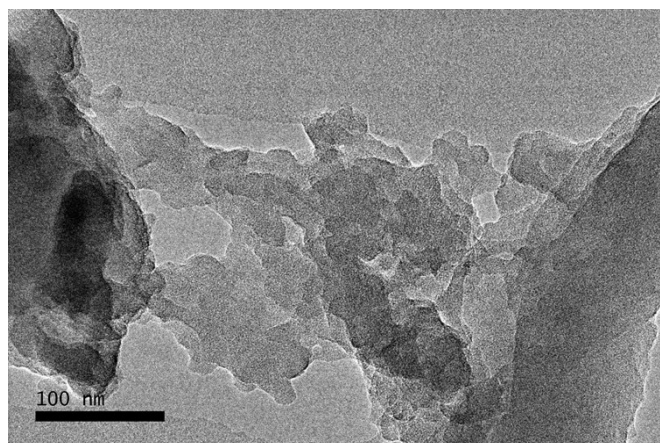

**Figure S1.** TEM image of NPS-IOC<sub>20</sub>.

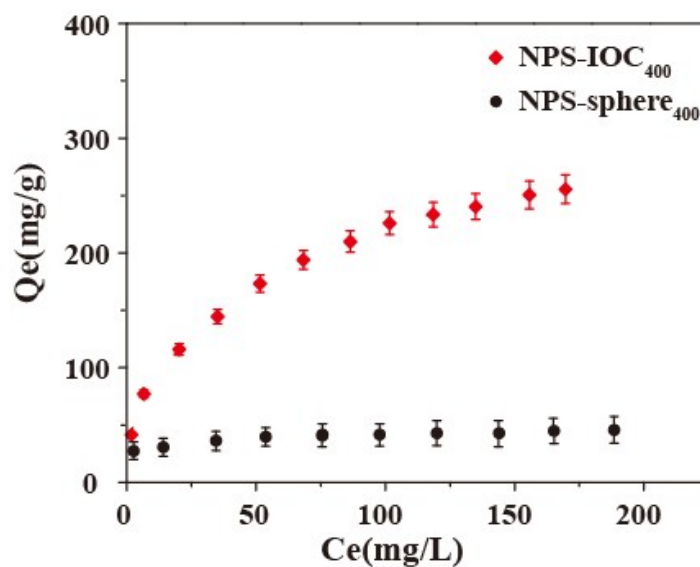

**Figure S2.** Comparison of NPS-IOC<sub>400</sub> and NPS-sphere<sub>400</sub> on the adsorption capacity of BPA. ( $C_{[BPA]initial} = 10-180$  mg/L,  $T = 298$  K,  $pH = 7.00 \pm 0.05$ ,  $m/V = 0.2$  g/L,  $C_{NaNO_3} = 0.01$  mol/L, 24h)

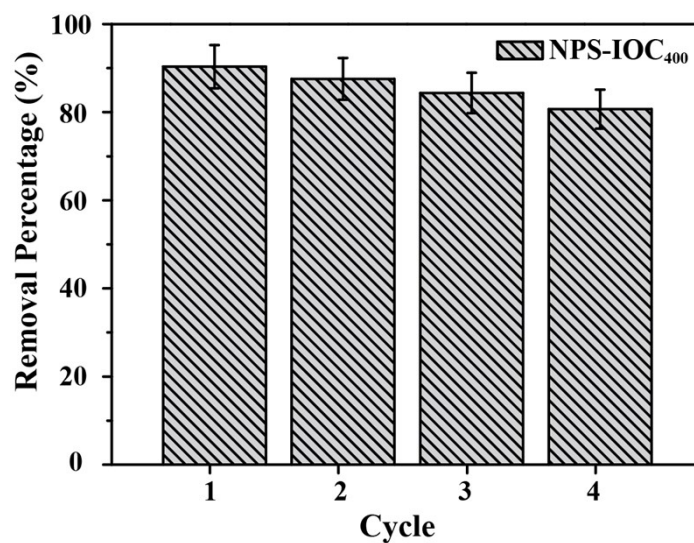

**Figure S3.** Recycling and stability of NPS-IOC<sub>400</sub>. ( $C_{[BPA]initial} = 10$  mg/L,  $T = 298$  K,

pH = 7.00 ± 0.05, m/V = 0.2 g/L, C<sub>NaNO<sub>3</sub></sub> = 0.01 mol/L, 24h

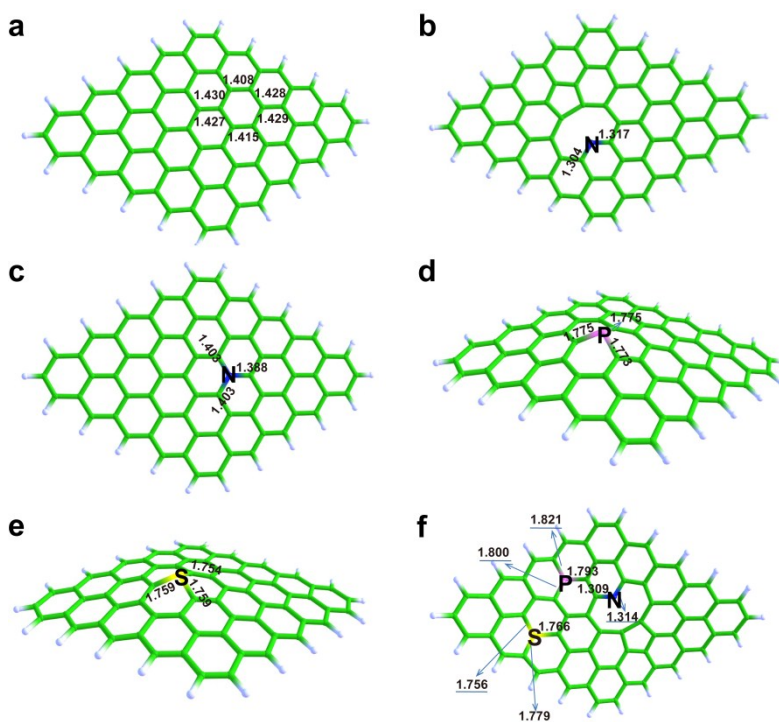

**Figure S4.** The optimized structures of (a) graphene; (b) pyridinic N-IOC; (c) graphitic N-IOC; (d) P-IOC; (e) S-IOC; (f) NPS-IOC. Bond lengths are in Å.

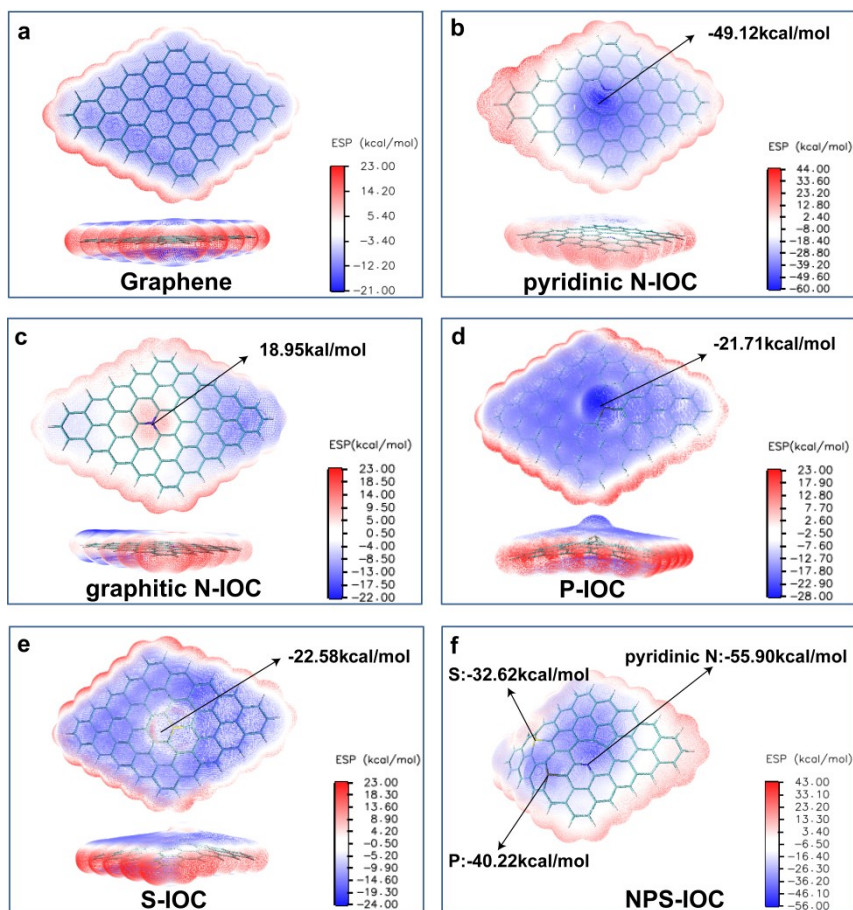

**Figure S5.** ESP plots of (a) graphene; (b) pyridinic N-IOC; (c) graphitic N-IOC; (d) P-IOC; (e) S-IOC; (f) NPS-IOC. The molecular surface was defined as the 0.001 au (electrons bohr<sup>-3</sup>) contour of the electronic density by Bader.<sup>4</sup> The red and blue regions in the plots were represented the positive and negative potential, respectively.

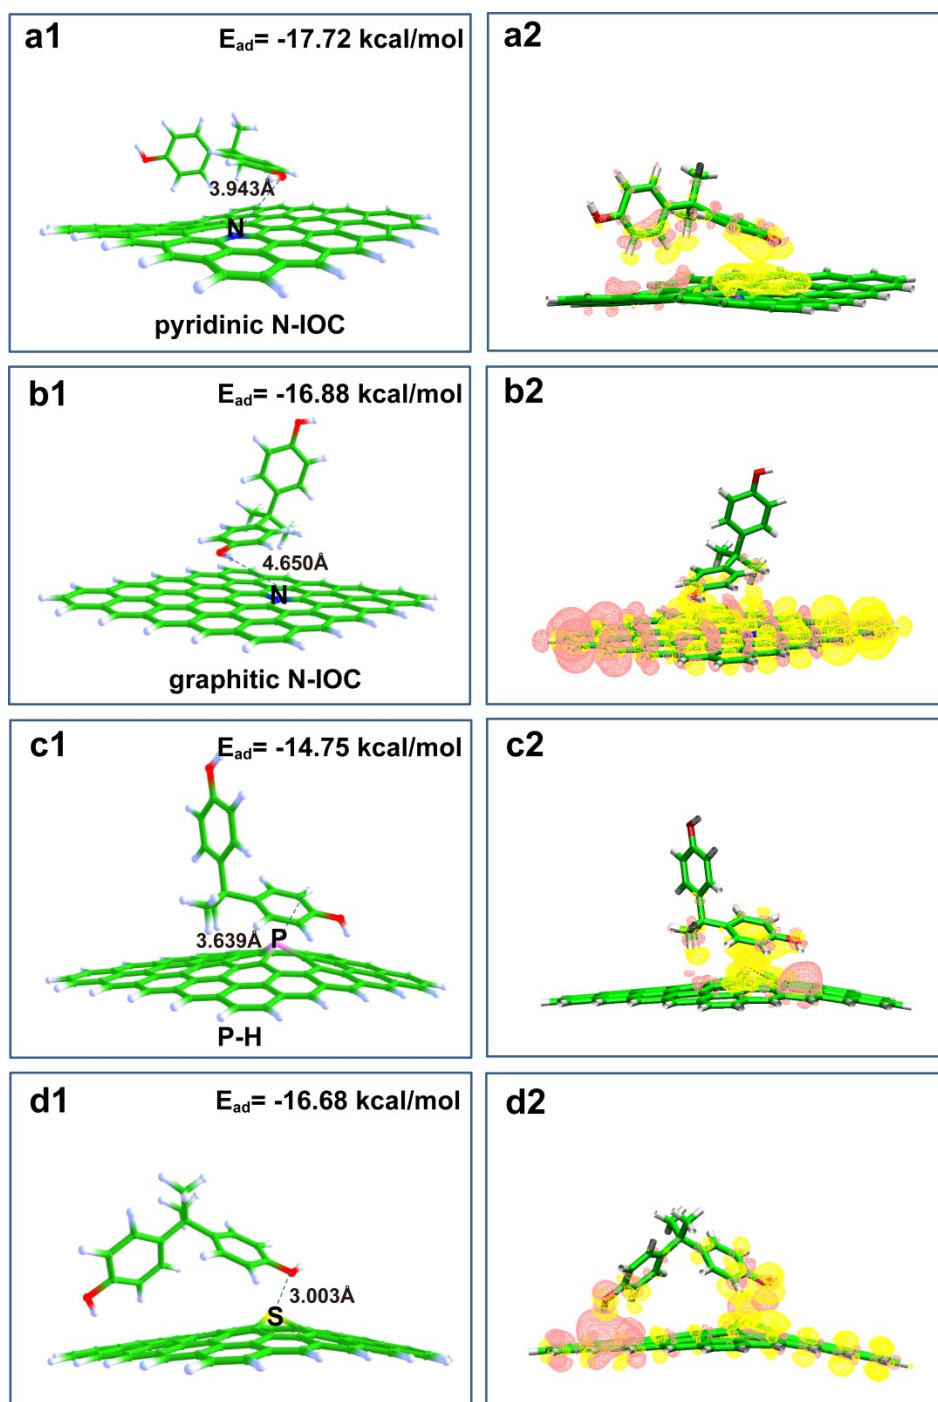

**Figure S6.** The optimized geometric structures and the charged density difference plots of BPA adsorbed on (a) pyridinic N-IOC; (b) graphitic N-IOC; (c) P-IOC; (d) S-IOC; Bond lengths are in Å.

**Table S1.** Element contents of NPS-IOC.

| Element name | Atomic (%)            |                        |                        |                        |
|--------------|-----------------------|------------------------|------------------------|------------------------|
|              | NPS-IOC <sub>20</sub> | NPS-IOC <sub>400</sub> | NPS-IOC <sub>700</sub> | NPS-IOC <sub>900</sub> |
| C            | 58.65                 | 69.28                  | 78.62                  | 84.92                  |
| O            | 17.55                 | 14.74                  | 10.93                  | 8.06                   |
| H            | 9.31                  | 5.02                   | 2.20                   | 1.15                   |
| N            | 5.59                  | 4.27                   | 3.36                   | 2.39                   |
| P            | 5.30                  | 4.05                   | 3.41                   | 2.52                   |
| S            | 3.60                  | 2.64                   | 1.48                   | 0.96                   |

**Table S2.** Kinetic parameters of BPA adsorption on NPS-IOC.

| Adsorbents              | Pseudo-first-order         |                    |       | Pseudo-second-order |                    |       |
|-------------------------|----------------------------|--------------------|-------|---------------------|--------------------|-------|
|                         | $k_1$ (min <sup>-1</sup> ) | $Q_{e,cal}$ (mg/g) | $R^2$ | $k_2$ (g/mg·min)    | $Q_{e,cal}$ (mg/g) | $R^2$ |
| NPS- IOC <sub>20</sub>  | 1.3116                     | 19.64              | 0.984 | 0.0493              | 10.43              | 0.999 |
| NPS- IOC <sub>400</sub> | 1.1213                     | 92.31              | 0.998 | 0.0736              | 46.73              | 1.000 |
| NPS- IOC <sub>700</sub> | 0.5908                     | 28.79              | 0.958 | 0.0226              | 15.70              | 0.999 |
| NPS- IOC <sub>900</sub> | 1.0673                     | 24.34              | 0.962 | 0.0326              | 13.18              | 0.995 |

**Table S3.** The parameters calculated from the Langmuir and Freundlich models.

| Adsorbents              | Langmuir model   |            |       | Freundlich model                            |         |       |
|-------------------------|------------------|------------|-------|---------------------------------------------|---------|-------|
|                         | $q_{max}$ (mg/g) | $b$ (L/mg) | $R^2$ | $K_F$ (mg <sup>1-n</sup> L <sup>n</sup> /g) | $n$     | $R^2$ |
| NPS- IOC <sub>20</sub>  | 67.95            | 0.015      | 0.962 | 1.7417                                      | 0.703   | 0.979 |
| NPS- IOC <sub>400</sub> | 255.39           | 0.030      | 0.911 | 28.8366                                     | 0.41021 | 0.989 |
| NPS- IOC <sub>700</sub> | 172.35           | 0.010      | 0.968 | 2.0932                                      | 0.8408  | 0.976 |
| NPS- IOC <sub>900</sub> | 146.92           | 0.004      | 0.981 | 3.0289                                      | 0.72    | 0.988 |

## References

1. G. E. Fryxell, Y. H. Lin, S. Fiskum, J. C. Birnbaum, H. Wu, K. Kemner, S. Kelly, Actinide sequestration using self-assembled monolayers on mesoporous supports. *Environ. Sci. Technol.*, 2005, **39**, 1324-1331.
2. Y. Zhao, Z. Y. Shao, C. L. Chen, J. Hu, H. L. Chen, Effect of environmental conditions on the adsorption behavior of Sr(II) by Na-rectorite *Appl. Clay Sci.*, 2014, **87**, 1-6.
3. W. Yao, S. J. Yu, J. Wang, Y. D. Zou, S. S. Lu, Y. J. Ai, N. S. Alharbi, A. Alsaedi, T. Hayat, X. K. Wang, Enhanced removal of methyl orange on calcined glycerol-modified nanocrystalline Mg/Al layered double hydroxides. *Chem. Eng. J.*, 2017, **307**, 476-486.
4. R. F. W. Bader, M. T. Carroll, J. R. Cheeseman, C. Chang, Properties of atoms in molecules: atomic volumes. *J. Am. Chem. Soc.*, 1987, **109**, 7968-7979.
